# Supplementary material for: Epidermal Loss of RORα Enhances Skin Inflammation in a MC903-Induced Mouse Model of Atopic Dermatitis
Source: MDPI journal article supplement (doi:10.3390/ijms241210241), 2023-06-16
Supplement: s1 [file s1]

## **SUPPLEMENTARY INFORMATION**

### **Epidermal loss of RORa enhances skin inflammation in MC903-induced mouse model of atopic dermatitis**

**Xiangmei Hua,<sup>1</sup> Conrad Dean Blosch,<sup>2</sup> Hannah Dorsey,<sup>1</sup> Maria K. Ficaró,<sup>1</sup> Nicole L. Wallace,<sup>1</sup> Richard P. Hsung,<sup>1</sup> Jun Dai<sup>1,3\*</sup>**

<sup>1</sup> School of Pharmacy, University of Wisconsin-Madison, WI, USA

<sup>2</sup> Biomedical Research Model Services, University of Wisconsin-Madison, WI, USA

<sup>3</sup> UW Carbone Cancer Center, University of Wisconsin-Madison, WI, USA

\* Corresponding author:

**Jun Dai, PhD**

Assistant Professor

The School of Pharmacy

University of Wisconsin, Madison

777 Highland Avenue

Madison, WI 53705

Tel: 608-292-3196

Email: [jdai32@wisc.edu](mailto:jdai32@wisc.edu)

## Supplementary Figure S1

### A. Figure 1C

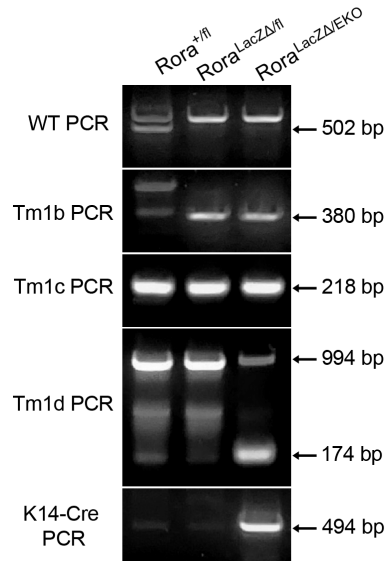

### B.

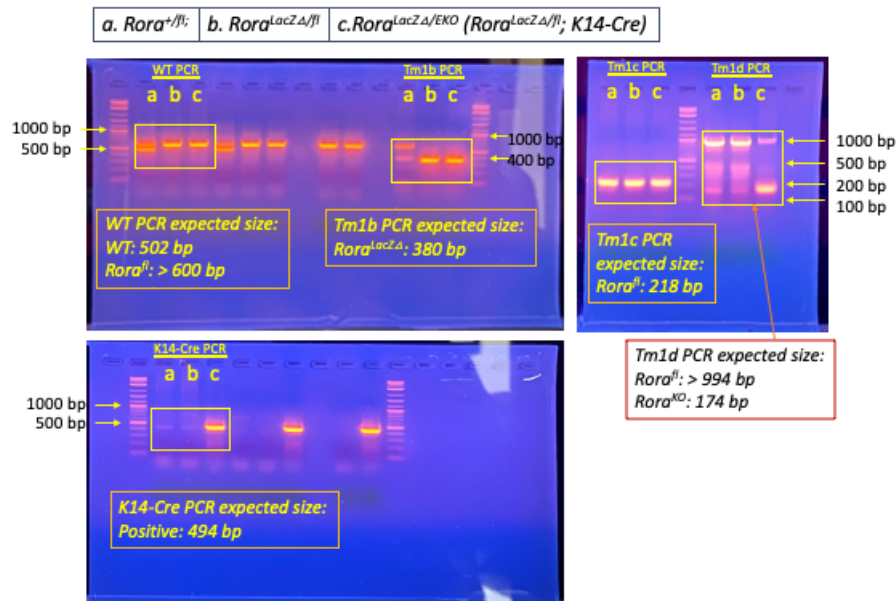

**Figure S1.** Validation of epidermal *Rora* depletion in *Rora*<sup>LacZΔ/EKO</sup> mice using short-range end-point PCR assays. (A) Genotyping results are shown in **Figure 1C** in the main text. (B) Original DNA gel images for the images are shown in (A). The PCR products were separated by 2% agarose gels and stained with ethidium bromide.

## Supplementary Figure S2

### A. Figure 2A

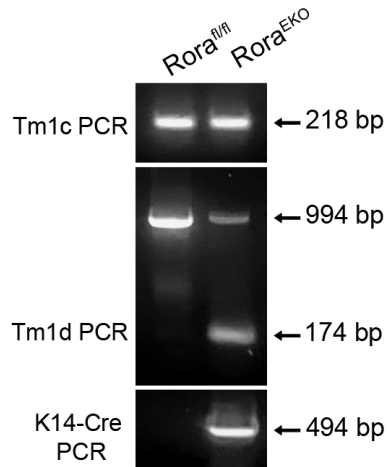

### B.

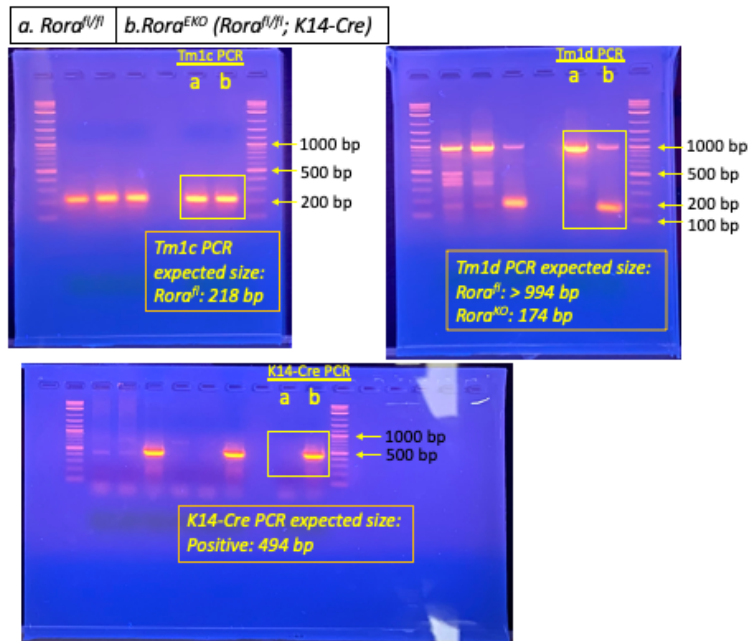

**Figure S2.** Validation of epidermal *Rora* depletion in *Rora*<sup>EKO</sup> mice using short-range end-point PCR assays. (A) Genotyping results are shown in **Figure 2A** in the main text. (B) Original DNA gel images for the images are shown in (A). The PCR products were separated by 2% agarose gels and stained with ethidium bromide.

Supplementary Figure S3

A. Figure 6C

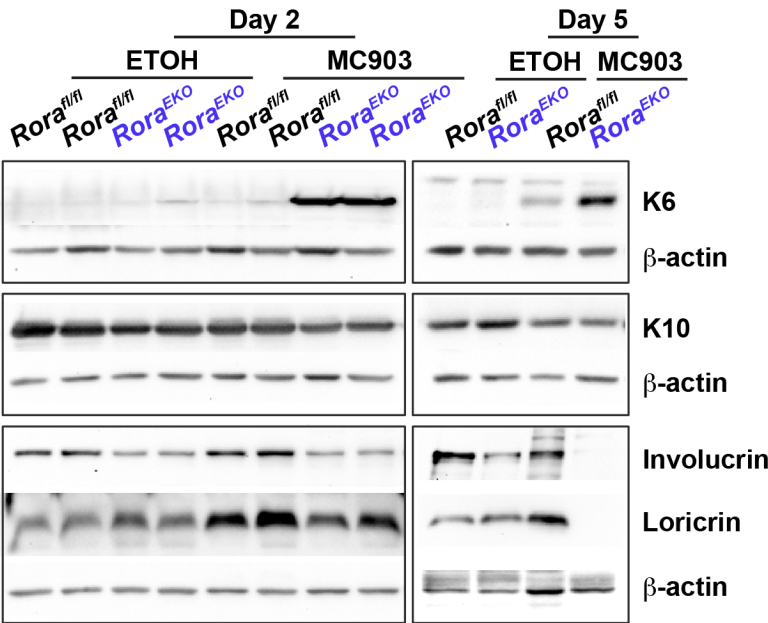

B.

Keratin 6 ; MC903 D2 & D5

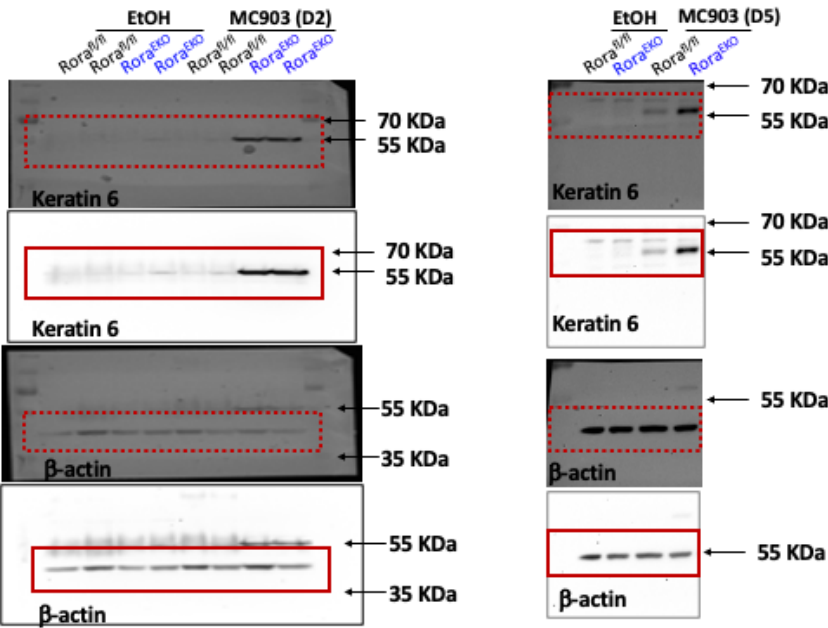

C.

### Keratin 10; MC903 D2 & D5

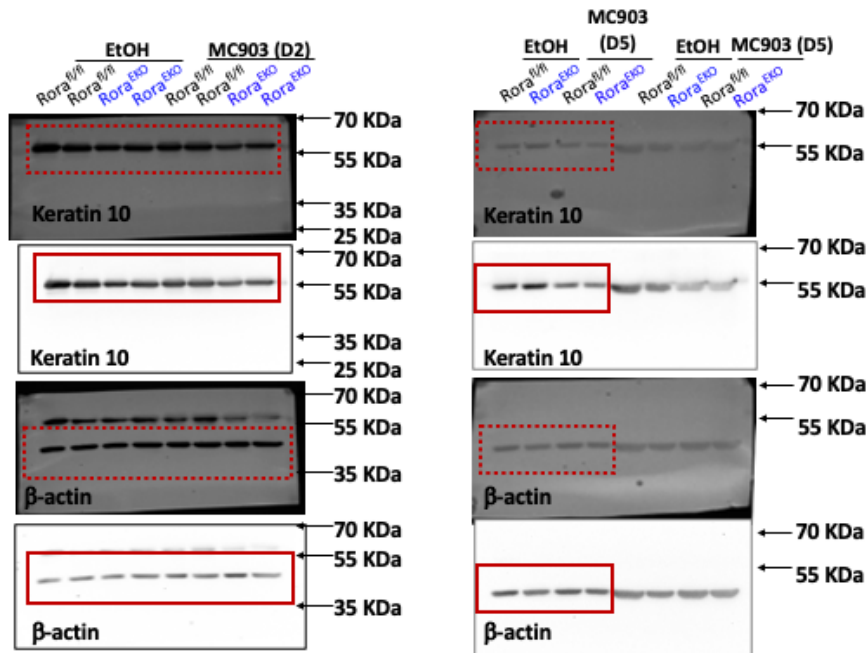

D.

### Involucrin & loricrin, MC903 (D2)

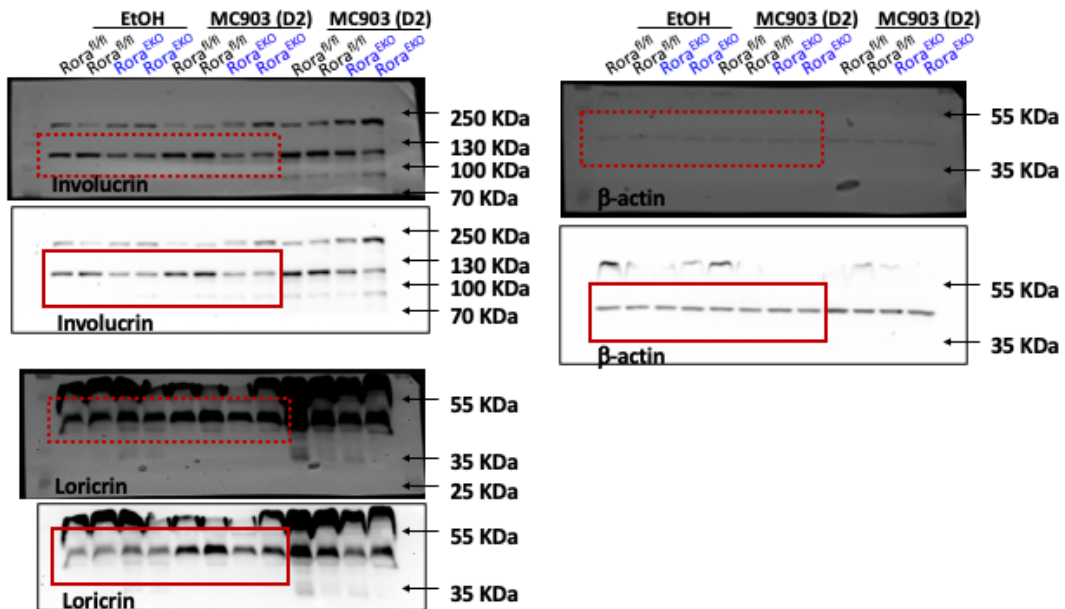

E.

Involucrin & loricrin; MC903 (D5)

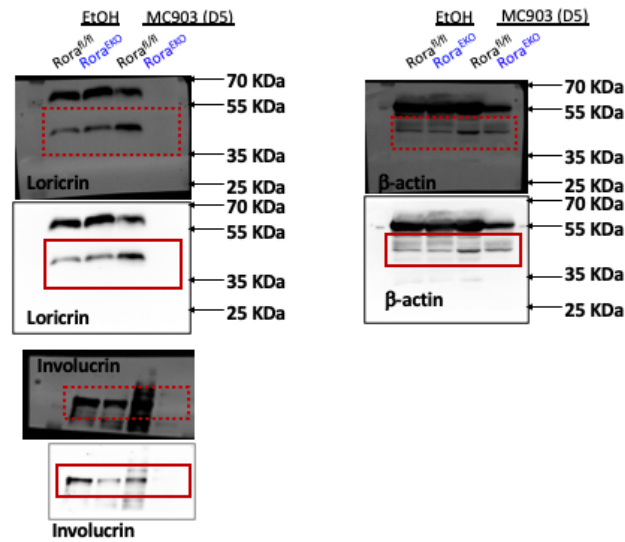

F.

Additional Involucrin & loricrin gel images; MC903 (D5)  
- For densitometry scanning

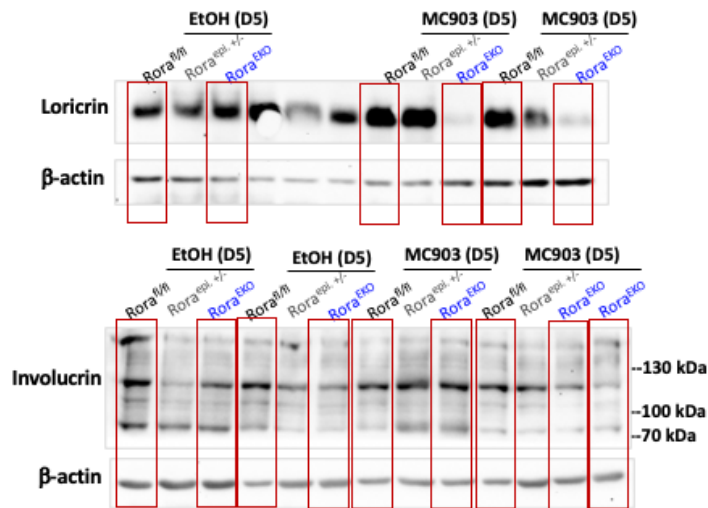

**Figure S3.** Western blot analysis of indicated proteins in ear samples collected on day 2 after EtOH- or MC903-treatment. (A) Western blot analysis results are shown in **Figure 6C** in the main text. (B-E) Original protein gel images for the images are shown in (A). For each band, the top image shows the membrane overlay and the lower image shows the chemiluminescence signal. (F) Additional gel images used for protein quantification shown in Figure 6D.

**Supplementary Table S1**

| <b>Supplementary Table S1: Primer sequences of mouse genes for RT-PCR and genotyping</b> |                          |                         |
|------------------------------------------------------------------------------------------|--------------------------|-------------------------|
| <b>Genes</b>                                                                             |                          |                         |
| <b>Primers for RT-PCR Analysis</b>                                                       | <b>Forward</b>           | <b>Reverse</b>          |
| <i>Rora</i>                                                                              | CTCGCTAGAGGTGGTGTATT     | GTCTTCACAACCTAGGGACTTG  |
| <i>Il1b</i>                                                                              | GGCAGGCAGTATCACTCATT     | GAGGATGGGCTCTTCTTCAAA   |
| <i>Cxcl2</i>                                                                             | ATCCAGAGCTTGAGTGTGACGC   | AAGGCAAACCTTTTGACCGCC   |
| <i>Cxcl10</i>                                                                            | GAATCCGGAATCTAAGACCATCAA | GTGCGTGGCTTCACTCCAGT    |
| <i>Krt16</i>                                                                             | GGTGGCCTCTAACAGTGATCT    | TGCATACAGTATCTGCCTTTGG  |
| <i>Tslp</i>                                                                              | GCTACCCTGAACTGAGAGAAA    | TCTGGAGATTGCATGAAGGAATA |
| <i>Spr2a</i>                                                                             | GCCTTGTCGTCCTGTCATGT     | GGCATTGCTCATAGCACACTAC  |
| <i>Cyp24a1</i>                                                                           | CTGCCCCATTGACAAAAGGC     | CTCACCGTCGGTCATCAGC     |
| <b>PCR primers for genotyping</b>                                                        | <b>Forward</b>           | <b>Reverse</b>          |
| <i>Rora WT</i>                                                                           | GAGAAGCTGCTGATCACTACA    | CTCTTGTGTATACCACCACA    |
| <i>Tm1b</i>                                                                              | CGGTCGCTACCATTACCAGT     | ACTGATGGCGAGCTCAGACC    |
| <i>Tm1c</i>                                                                              | AAGGCGCATAACGATAACCAC    | CCGCCTACTGCGACTATAGAGA  |
| <i>Tm1d</i>                                                                              | AAGGCGCATAACGATAACCAC    | ACTGATGGCGAGCTCAGACC    |
| <i>K14-CRE</i>                                                                           | TTCCTCAGGAGTGTCTTCGC     | GTCCATGTCCTTCCTGAAGC    |

## Supplementary Table S2

| <b>Supplementary Table S2: Primary antibodies used for immunostaining and western blot</b> |                                        |                    |
|--------------------------------------------------------------------------------------------|----------------------------------------|--------------------|
| <b>Name</b>                                                                                | <b>Source</b>                          | <b>Catalog no.</b> |
| Loricrin                                                                                   | BioLegend (Covance), Dedham, MA        | pRB-145P           |
| F4/80-Biotin                                                                               | Bio-Rad, Hercules, CA                  | MCA497             |
| Keratin 10                                                                                 | BioLegend (Covance)                    | PRB-159P           |
| Keratin 6                                                                                  | BioLegend (Covance)                    | PRB-169P           |
| TSLP                                                                                       | R&D Systems, Minneapolis, MN           | AF555              |
| CD4                                                                                        | BioLegend (Covance)                    | 100446             |
| CD11c                                                                                      | BioLegend (Covance)                    | 117346             |
| β-Actin (13E5)                                                                             | Cell Signaling Technology, Danvers, MA | 4970S              |
